# Supplementary material for: Simultaneous Separation and Purification of Five Polymethoxylated Flavones from “Dahongpao” Tangerine (Citrus tangerina Tanaka) Using Macroporous Adsorptive Resins Combined with Prep-HPLC
Source: PubMed Central journal article supplement (PMC6222627; doi:10.3390/molecules23102660), 2018-10-16
Supplement: molecules-23-02660-s001.pdf [file molecules-23-02660-s001.pdf]

## Supplementary Materials:

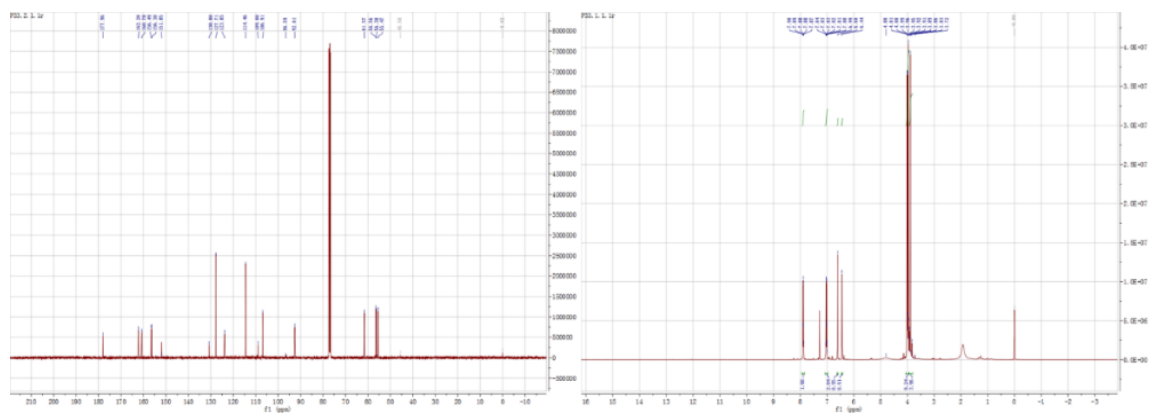

Figure S1.  $^{13}\text{C}$ - and  $^1\text{H}$ -NMR spectrum of 5,6,7,4'-tetramethoxyflavone.

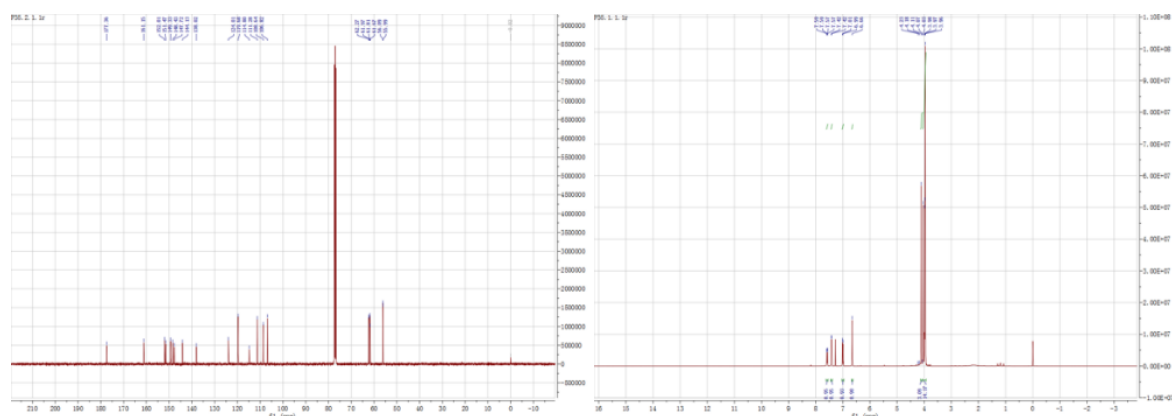

Figure S2.  $^{13}\text{C}$ - and  $^1\text{H}$ -NMR spectrum of nobiletin.

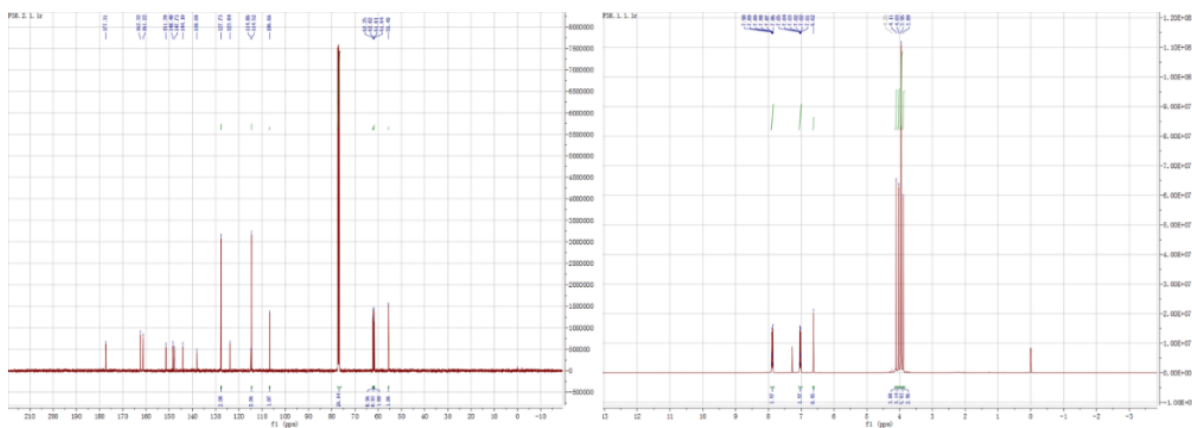

Figure S3.  $^{13}\text{C}$ - and  $^1\text{H}$ -NMR spectrum of tangeretin.

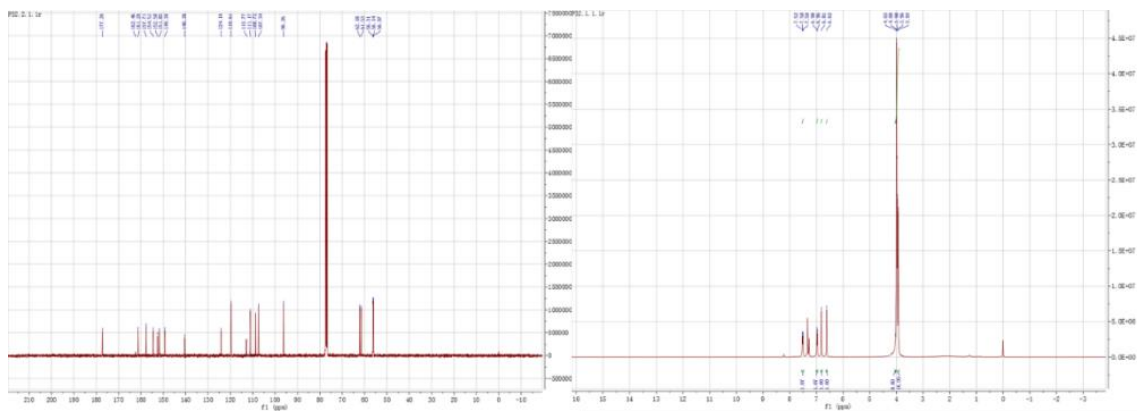

**Figure S4.**  $^{13}\text{C}$ - and  $^1\text{H}$ -NMR spectrum of sinensetin.

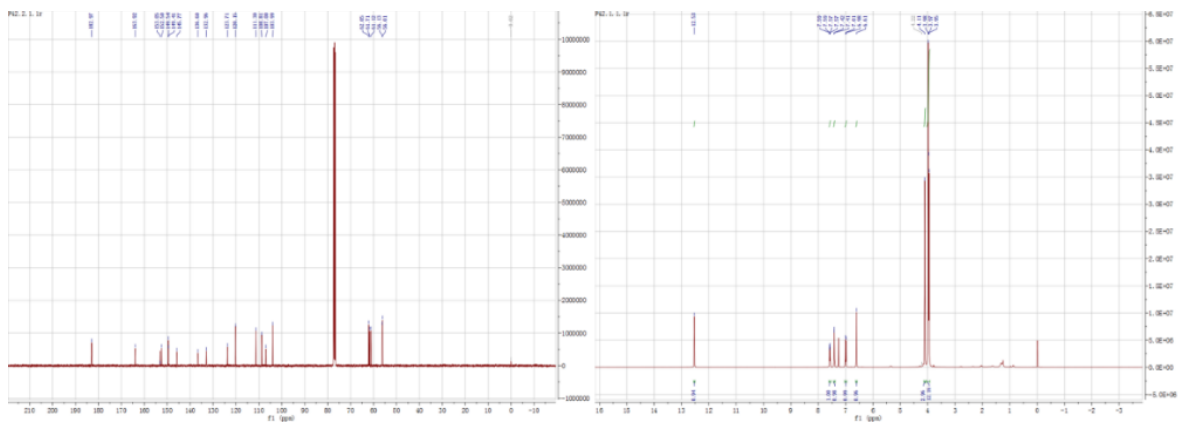

**Figure S5.**  $^{13}\text{C}$ - and  $^1\text{H}$ -NMR spectrum of 5-hydroxy-6,7,8,3',4'-pentamethoxyflavone.
